# Supplementary material
Source: Springer Nature journal article supplement (https://www.springermedizin.de/resource/supplementary/13044_2012_71_MOESM1_ESM.pdf/9660074)

Methimazole

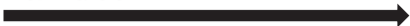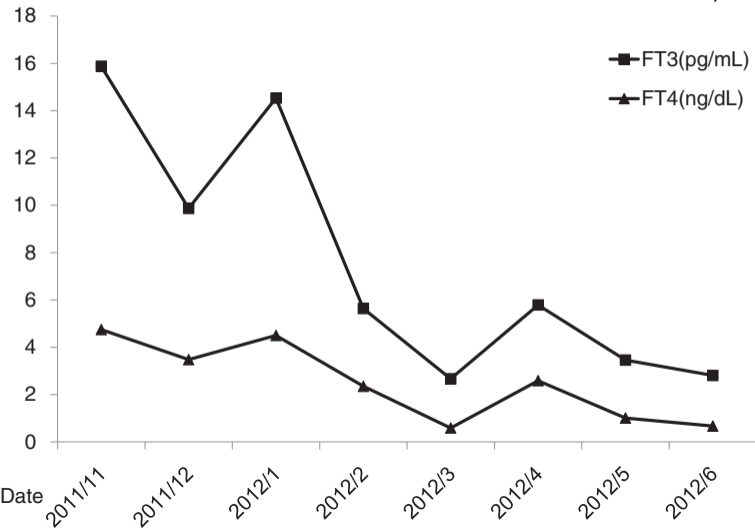

Supplement: MOESM1 [file 9660074]
